# Supplementary material for: Facile colorimetric assay for trinitrotoluene based on the intrinsic peroxidase-like activity of MoS2 nanosheets
Source: Royal Society of Chemistry journal article supplement (doi:10.1039/c7ay00484b), 2017-01-01
Supplement: c7ay00484b1.pdf [file c7ay00484b1.pdf]

## Supporting Information

### **Facile colorimetric assay for trinitrotoluene based on the intrinsic peroxidase-like activity of MoS<sub>2</sub> nanosheets**

Yan Wang<sup>a</sup>, Yi He<sup>b,\*</sup>, Rufang Peng<sup>a,\*</sup>, Shijin Chu<sup>a</sup>

<sup>a</sup> School of Materials Science and Engineering & State Key Laboratory Cultivation Base for Nonmetal Composite and Functional Materials, Southwest University of Science and Technology, Mianyang, 621010, P. R. China

<sup>b</sup> School of National Defence Science & Technology, Southwest University of Science and Technology, Mianyang 621010, P. R. China

\*Corresponding author: Dr. Yi He, Tel: +86-816-6089885, Email: yhe2014@126.com.

Dr. Rufang Peng, Fax:86-816-2419011, Email: pengrufang@swust.edu.cn.

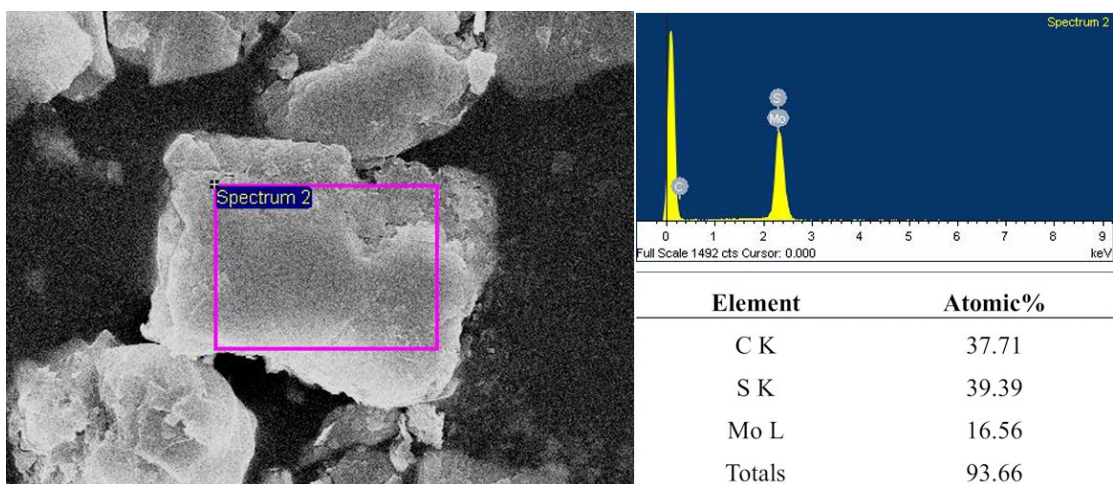

**Figure S1** EDS analysis of Cys-MoS<sub>2</sub> NSs. The component and stoichiometry of Cys-MoS<sub>2</sub> NSs with the Mo/S atomic ratio of ~ 1:2, with the higher S content being ascribed to the presence of cysteine adsorbed on the surface of MoS<sub>2</sub> NSs.

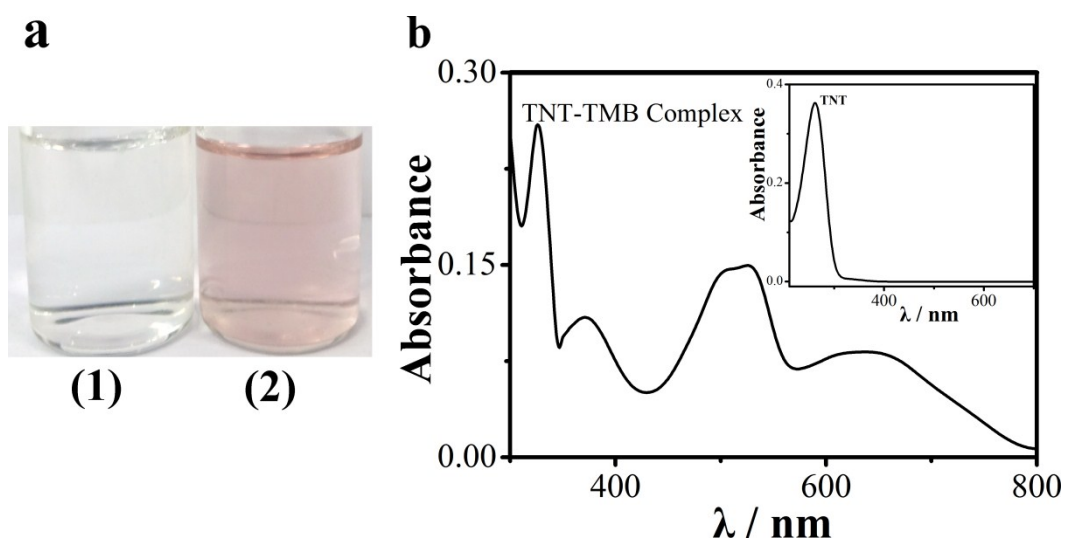

**Figure S2** (a) Photograph showing how TNT changes the color when it forms Meisenheimer complex with TMB (8 mM TNT and 2.5 mM TMB): (1) 8 mM only TNT, (2) Meisenheimer complex after addition 2.5 mM in 8 mM TNT. (b) UV-vis absorption spectra demonstrating new peaks at 525 nm and 635 nm compared with TNT due to the formation of Meisenheimer complex between TNT and TMB. The inset of (b) is the UV-vis absorption spectrum of TNT.

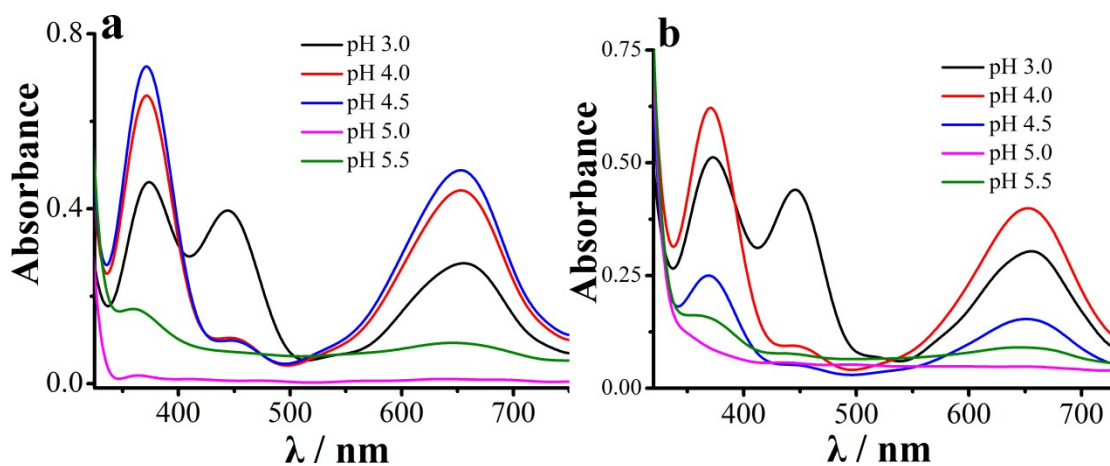

**Figure S3** UV-vis absorption spectra of TMB reaction system in the absence (a) and presence of TNT (b) at different pH values (3.0, 4.0, 4.5, 5.0, 5.5).

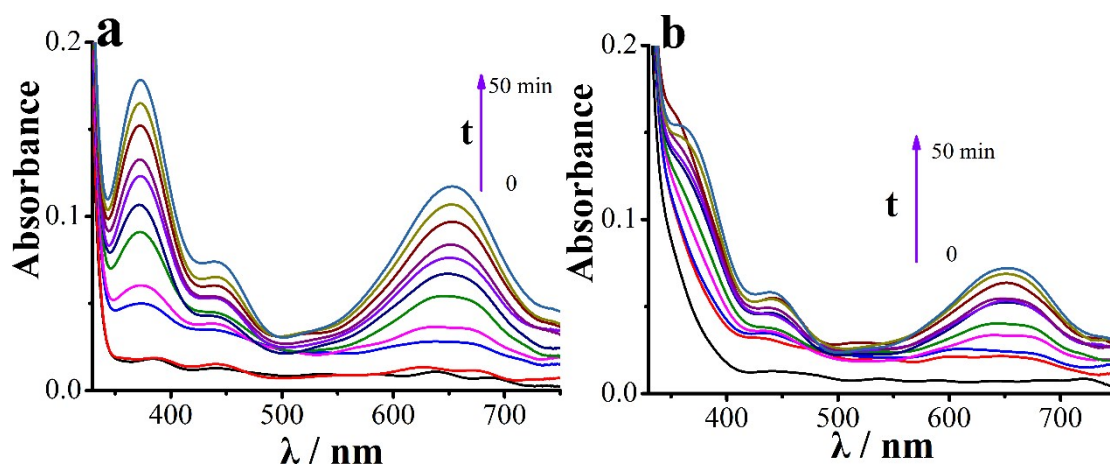

**Figure S4** (a) Time-dependent absorbance changes at 652 nm of Cys-MoS<sub>2</sub> NSs + TMB + H<sub>2</sub>O<sub>2</sub> systems. (b) Time-dependent absorbance changes at 652 nm of Cys-MoS<sub>2</sub> NSs + TMB + H<sub>2</sub>O<sub>2</sub> + TNT systems. The concentration of TMB reaction systems: 10  $\mu\text{g}\cdot\text{mL}^{-1}$  Cys-MoS<sub>2</sub> NSs, 2.5 mM TMB, 4 mM H<sub>2</sub>O<sub>2</sub> and 1 mM TNT, respectively.

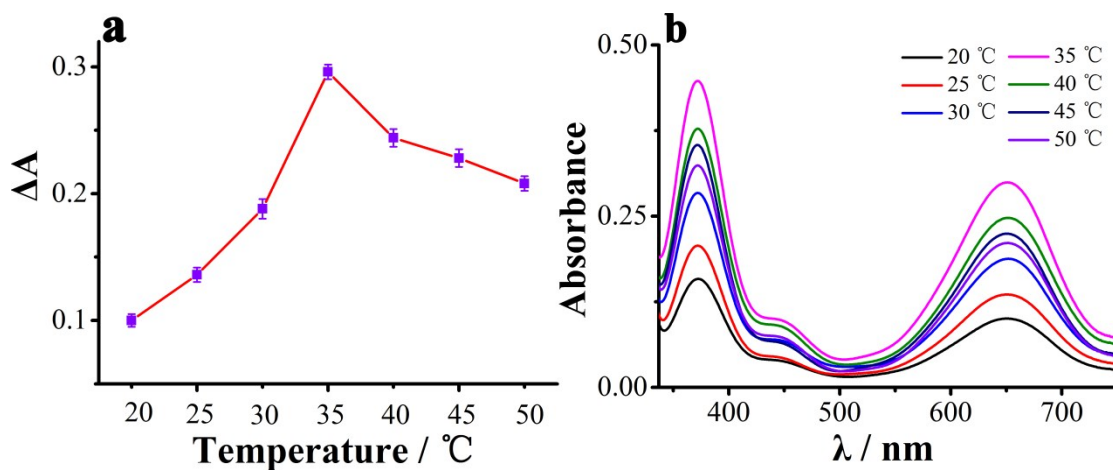

**Figure S5** (a) The  $\Delta A$  of TMB reaction systems and (b) UV-vis absorption spectra of TMB reaction systems in different temperatures.

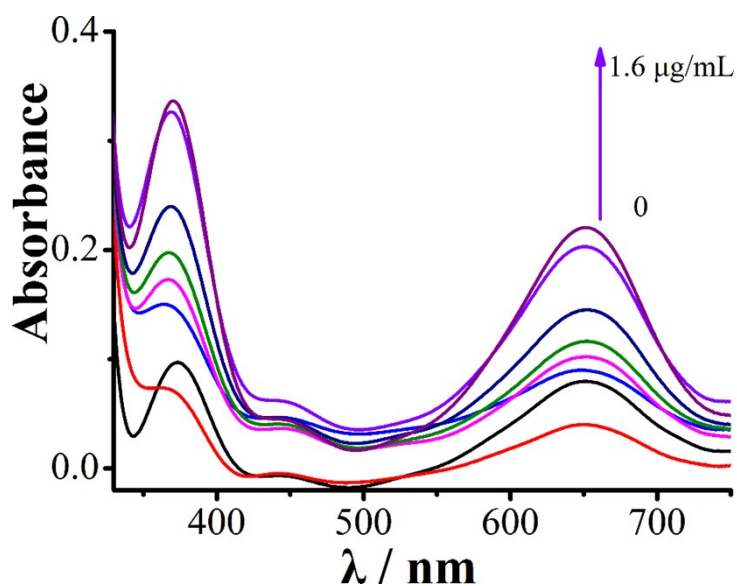

**Figure S6** UV-vis absorption spectra of TMB reaction system with different concentrations of Cys-MoS<sub>2</sub> NSs (0, 0.05, 0.1, 0.2, 0.4, 0.5, 0.8, 1.6  $\mu\text{g}\cdot\text{mL}^{-1}$ ).

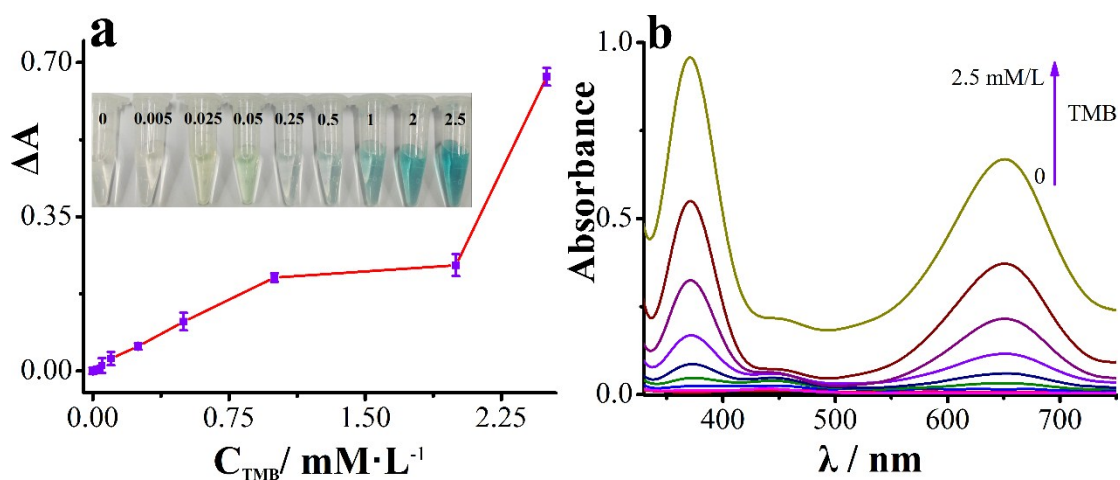

**Figure S7** (a) The  $\Delta A$  of TMB reaction systems and (b) UV-vis absorption spectra of TMB reaction systems with different concentration of TMB. The inset shows the photos of TMB reaction system.

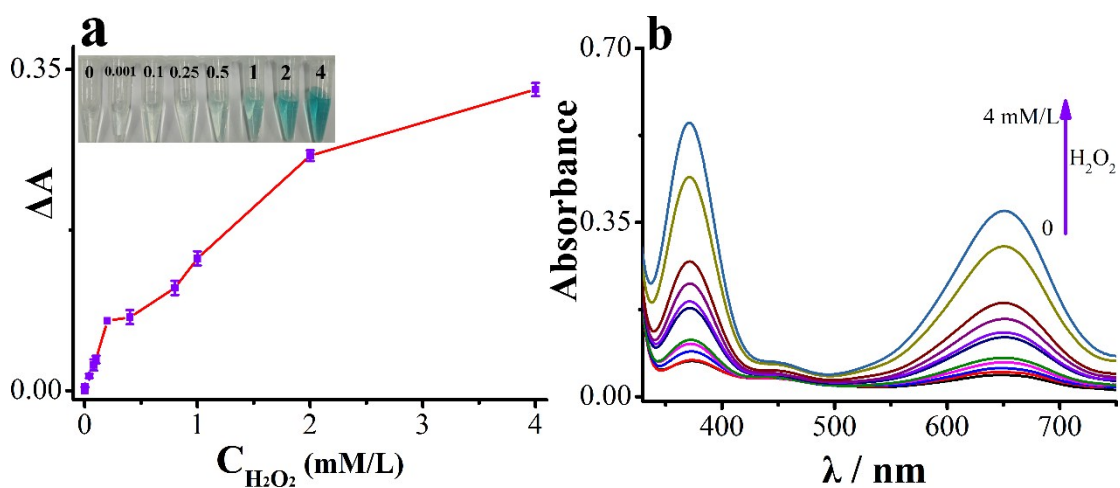

**Figure S8** (a) The  $\Delta A$  of TMB reaction systems change in different concentration of  $\text{H}_2\text{O}_2$  (0, 0.001, 0.1, 0.2, 0.25, 0.5, 1, 2, 4 mM). The inset of (a) are images of colored products for different concentrations of  $\text{H}_2\text{O}_2$ . (b) A concentrate-response curve for  $\text{H}_2\text{O}_2$ .

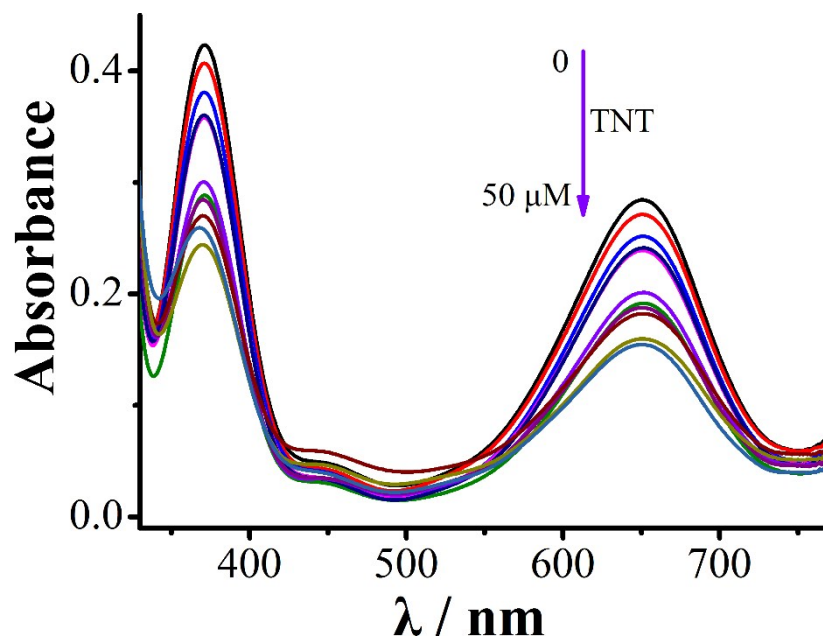

**Figure S9** UV-vis absorption spectra of TMB reaction systems in the presence of TNT solution with different concentrations (0, 0.25, 0.5, 1, 1.25, 2.5, 5, 10, 25 and 50  $\mu\text{M}$ ).
